# Supplementary material
Source: publisher figshare collection journal article supplement (https://plos.figshare.com/articles/dataset/_/678620)
Supplement: Supplementary file [file 1]

| Phenotype                                                                                                                                | Ethnicity/Population              | Number of individuals | MeSH Heading                                  |
|------------------------------------------------------------------------------------------------------------------------------------------|-----------------------------------|-----------------------|-----------------------------------------------|
| Alzheimer disease                                                                                                                        | Chiba Japan                       | 96                    | Alzheimer disease                             |
| Asthenozoospermic                                                                                                                        | Portugal                          | 20                    | Sperm Motility                                |
| Atypical psychosis                                                                                                                       | Japan                             | 57                    | Psychotic Disorders                           |
| Breast cancer                                                                                                                            | Italy                             | 19                    | Breast Neoplasm                               |
|                                                                                                                                          | Romania                           | 1                     |                                               |
| CADASIL                                                                                                                                  | Finland                           | 77                    | CADASIL                                       |
| Centenarian                                                                                                                              | Gifu Japan                        | 11                    |                                               |
|                                                                                                                                          | Gifu Japan                        | 11                    | Aged, 80 and over                             |
|                                                                                                                                          | Tokyo Japan                       | 85                    |                                               |
| chronic progressive external ophthalmoplegia (CPEO)                                                                                      | Bonn, Germany                     | 1                     | Ophthalmoplegia, Chronic Progressive External |
| diabetes and deafness                                                                                                                    | The Netherlands                   | 1                     | Diabetes and deafness, maternally inherited   |
| Diabetes Type II                                                                                                                         | Aichi Japan                       | 96                    | Diabetes Mellitus, Type 2                     |
|                                                                                                                                          | Ashkenazi Jew; Belarus            | 1                     |                                               |
| Diabetic with angiopathy                                                                                                                 | Tokyo Japan                       | 96                    | Diabetic Angiopathies                         |
| genotype: POLG1 G268A                                                                                                                    | Russia: Belgorod                  | 1                     | DNA-Directed DNA Polymerase                   |
| genotype: POLG1 variant T251I                                                                                                            | Russia: Belgorod                  | 1                     | DNA-Directed DNA Polymerase                   |
| Glioma                                                                                                                                   | Italy                             | 16                    | Glioma                                        |
| LHON                                                                                                                                     | Central China                     | 2                     | Optic Atrophy, Hereditary, Leber              |
|                                                                                                                                          | China                             | 1                     |                                               |
|                                                                                                                                          | Italy                             | 7                     |                                               |
|                                                                                                                                          | Brazil                            | 1                     |                                               |
|                                                                                                                                          | Tuvan, Russia, North-East Siberia | 1                     |                                               |
|                                                                                                                                          | slavic, Siberia, Russia           | 2                     |                                               |
| MELAS                                                                                                                                    | Turkey                            | 1                     | MELAS Syndrome                                |
|                                                                                                                                          | Vietnam                           | 1                     |                                               |
|                                                                                                                                          | Germany                           | 1                     |                                               |
| MERRF                                                                                                                                    | Germany                           | 1                     | MERRF Syndrome                                |
| neurofibromatosis type 1                                                                                                                 |                                   | 4                     | Neurofibromatosis 1                           |
| Non-obese young male                                                                                                                     | Aichi Japan                       | 96                    | No suitable term                              |
| Obese young male                                                                                                                         | Aichi Japan                       | 96                    | No suitable term                              |
| OXPHOS deficiency                                                                                                                        | The Netherlands: Nijmegen         | 28                    | Mitochondrial Diseases                        |
| Parkinson disease                                                                                                                        | Tokyo; Japan                      | 96                    | Parkinson Disease                             |
| primary cancerous tissue                                                                                                                 | China                             | 10                    | No suitable term                              |
| Semi-supercentenarian                                                                                                                    | Japan                             | 112                   | Aged, 80 and over                             |
| stroke-like episodes, lactic acidosis, exercise intolerance similar to that seen in MELAS; two episodes of transient central vision loss | Ashkenazi, Jew, Poland            | 1                     |                                               |
| Teratozoospermic                                                                                                                         | Portugal                          | 23                    | No suitable term                              |
| Thyroid cancer                                                                                                                           | Italy                             | 64                    | Thyroid Neoplasms                             |
|                                                                                                                                          | Albania                           | 1                     |                                               |
|                                                                                                                                          | Chile                             | 1                     |                                               |
