# Supplementary material
Source: publisher figshare collection journal article supplement (https://plos.figshare.com/articles/dataset/_/678620)
Supplement: Supplementary file [file 1]

| Metadata                    | Status in LOVD |
|-----------------------------|----------------|
| Variant/Exon                | Recommended    |
| Variant/DNA_genomic         | Obligatory     |
| Variant/DNA_coding          | Recommended    |
| Variant/RNA                 | Obligatory     |
| Variant/Protein             | Obligatory     |
| Variant/DBID                | Obligatory     |
| Variant/Reference           | Obligatory     |
| Variant/DNA_published       | Recommended    |
| Variant/Detection/Template  | Obligatory     |
| Variant/Detection/Technique | Obligatory     |
| Variant/DNA_remark          | Recommended    |
| Variant/Frequency           | Recommended    |
| Variant/Origin              | Recommended    |
| Variant/Allele              | Recommended    |
| Variant/Pathogenicity       | Recommended    |
| Patient/Patient_ID          | Obligatory     |
| Patient/Phenotype/Disease   | Obligatory     |
| Patient/Remarks             | Recommended    |
| Patient/Origin/Geographic   | Recommended    |
| Patient/Origin/Ethnic       | Recommended    |
| Patient/Gender              | Recommended    |
| ID_submitterid              | Obligatory     |
| Variant/HGNC gene Symbol    | Obligatory     |
